# Supplementary material
Source: PubMed Central journal article supplement (PMC3070552)
Supplement: mmc1.pdf [file mmc1.pdf]

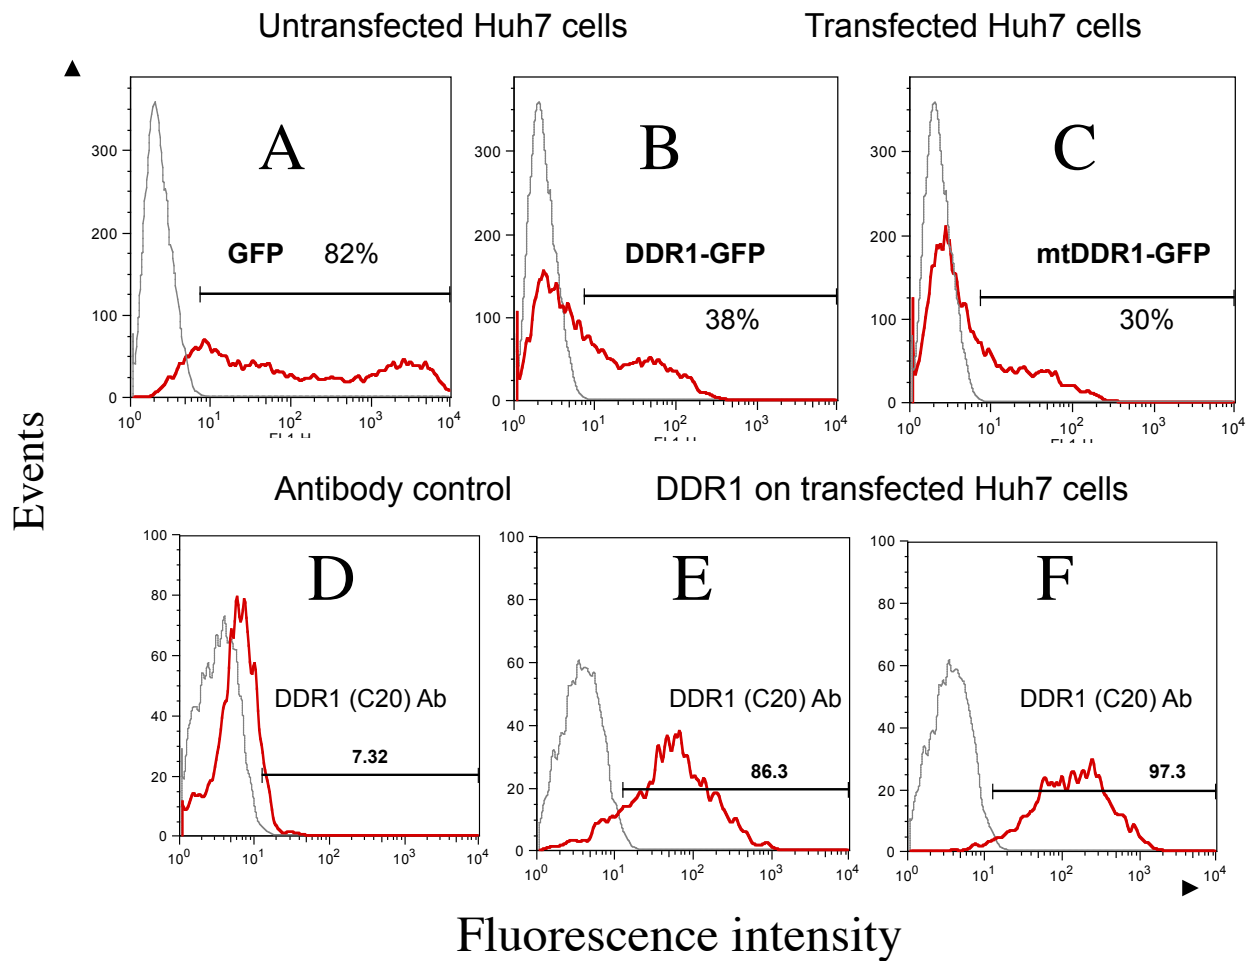

**Supplemental Figure S1.** Flow cytometry analysis of DDR1-GFP and mtDDR1-GFP recombinant protein expression in transfected cells by detecting GFP-derived fluorescence (A-C) or the binding of an antibody to the cytoplasmic beta subunit (C20 Ab).
