# Supplementary material
Source: PubMed Central journal article supplement (PMC3070552)
Supplement: mmc3.pdf [file mmc3.pdf]

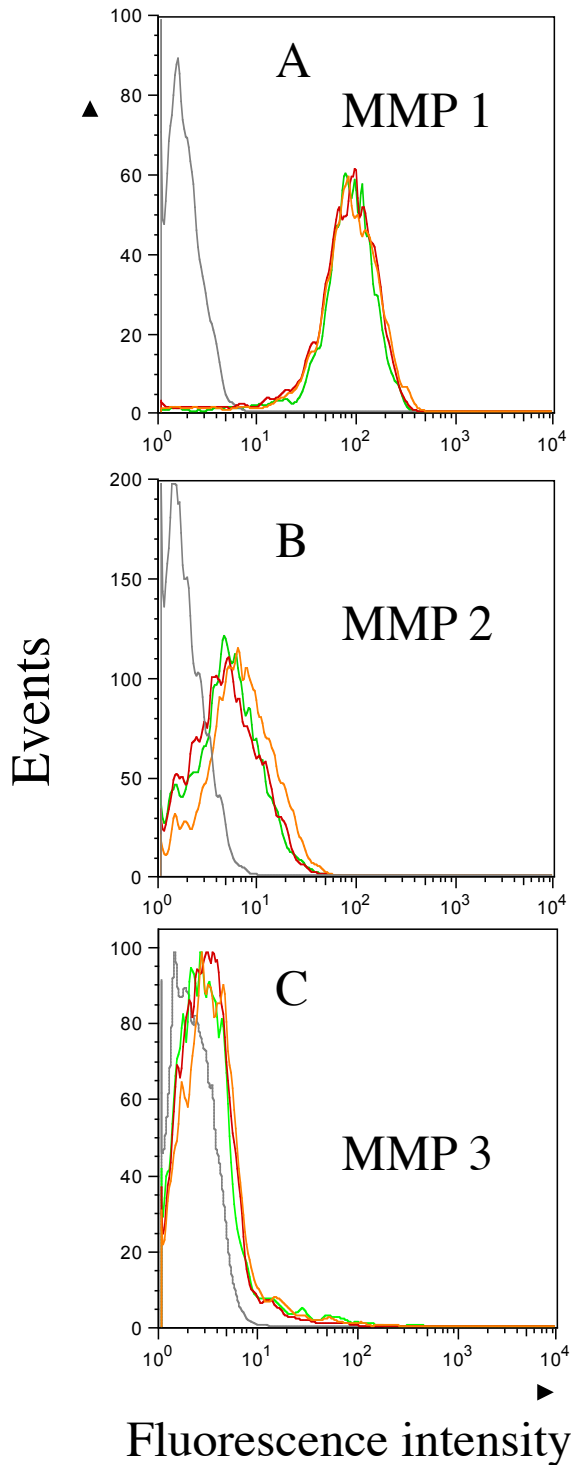

Antibody control  
 GFP transfected cells  
 DDR1-GFP transfected cells  
 mtDDR1-GFP transfected cells

**Supplemental Figure S3. Flow cytometry analysis of MMP protein expression in DDR1 transfected cells.** Transfected Huh7 cells were permeabilized with 0.5% saponin before incubation with antibodies to MMP1 and MMP2. DDR1-GFP, and mtDDR1-GFP transfected cells showed unaltered MMP1 and MMP2 expression.
